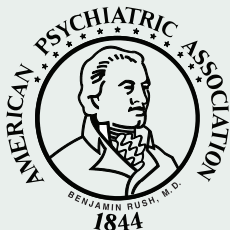

# The American Journal of Psychiatry

Official Journal of the American Psychiatric Association

## Officers 2014–2015

### President

Paul Summergrad, M.D.

### President-Elect

Renée L. Binder, M.D.

### Treasurer

Frank W. Brown, M.D.

### Secretary

Maria A. Oquendo, M.D.

### Assembly

#### Speaker

Jenny L. Boyer, M.D., Ph.D., J.D.

#### Speaker-Elect

Glenn A. Martin, M.D.

#### Recorder

Daniel J. Anzia, M.D.

### Office of the CEO and Medical Director

#### CEO and Medical Director

Saul Levin, M.D., M.P.A.

### Board of Trustees

Jeffrey Akaka, M.D.

R. Scott Benson, M.D.

Lara J. Cox, M.D., M.S.

Brian Crowley, M.D.

Anita S. Everett, M.D.

Jeffrey L. Geller, M.D., M.P.H.

Dilip V. Jeste, M.D.

Judith F. Kashtan, M.D.

Jeffrey A. Lieberman, M.D.

Molly K. McVoy, M.D.

John M. Oldham, M.D.

Vivian B. Pender, M.D.

Gail E. Robinson, M.D.

Ravi N. Shah, M.D.

Melinda Young, M.D.

## Editorial Board

### Editor

Robert Freedman, M.D.

### Deputy Editors

David A. Lewis, M.D.

Robert Michels, M.D.

Daniel S. Pine, M.D.

A. John Rush, M.D.

Susan K. Schultz, M.D.

Carol A. Tamminga, M.D.

### Associate Editors

Alan Brown, M.D., M.P.H.

Tyrone Cannon, Ph.D.

Benjamin G. Druss, M.D., M.P.H.

Graham J. Emslie, M.D.

Daniel C. Javitt, M.D.

Bankole Johnson, M.D.

Ellen Leibenluft, M.D.

Joan L. Luby, M.D.

Constantine G. Lyketsos, M.D., M.H.S.

Helen S. Mayberg, M.D., F.R.C.P.C.

Barbara Milrod, M.D.

Terrie E. Moffitt, Ph.D.

Anita Thapar, M.B.B.Ch., F.R.C.Psych.,

Ph.D., F.Med.Sci.

Mauricio Tohen, M.D., Dr.PH., M.B.A.

Eduard Vieta, M.D., Ph.D.

Katherine L. Wisner, M.D., M.S.

Xin Yu, M.D.

### Editor Emerita

Nancy C. Andreasen, M.D., Ph.D.

### Former Editors

Amariah Brigham, M.D., 1844–1849

T. Romeyn Beck, M.D., 1849–1854

John P. Gray, M.D., 1854–1886

G. Alder Blumer, M.D., 1886–1894

Richard Dewey, M.D., 1894–1897

Henry M. Hurd, M.D., 1897–1904

Edward N. Brush, M.D., 1904–1931

Clarence B. Farrar, M.D., 1931–1965

Francis J. Braceland, M.D., 1965–1978

John C. Nemiah, M.D., 1978–1993

### Editorial Staff

#### Executive Editor

Michael D. Roy

#### Senior Editor/Features Writer

Jane Weaver, E.L.S.

#### Senior Editor

John J. Guardiano, Ph.D.

#### Production Manager

Susan Westrate

#### Assistant Editors

Angela Moore

#### Editorial Support Services Manager

Nicole Gray

#### Editorial Assistant

Linda LaCour

#### Editorial Assistant/Permissions

##### Coordinator

Jane Cha

#### Assistants to the Editors

Lois Lilienthal

Laura English

Rachel Hogg

Russell A. Scholl

### Publisher

Rebecca D. Rinehart

# The Residents' JOURNAL

## THE AMERICAN JOURNAL OF PSYCHIATRY RESIDENTS' JOURNAL

March 2015

Volume 10

Issue 3

### Inside

**Major Depressive Disorder:  
The Renewed Search for New  
Targets and Treatments**  
Samuel T. Wilkinson, M.D.

**Recent Literature on  
Electroconvulsive Therapy  
Techniques for the Treatment  
of Depression**  
Sandarsh Surya, M.B.B.S., and  
Neil Mori, M.D.

**Ketamine Infusion for the  
Treatment of Depression**  
Mahalia L. Way, M.D., Ph.D.

**Low-Field Magnetic  
Stimulation: The Next Big  
Thing?**  
Stanley Lyndon, M.D.

**A Question of Balance:  
Preventing Relapse of  
Psychotic Depression**  
Laurel D. Pellegrino, M.D.

**DRESS Syndrome Induced by  
Antidepressant Sertraline**  
Meredith Brandon, M.D.

**When Parents Kill: A Review  
of Infanticide**  
Samuel J. House, M.D.

### In This Issue

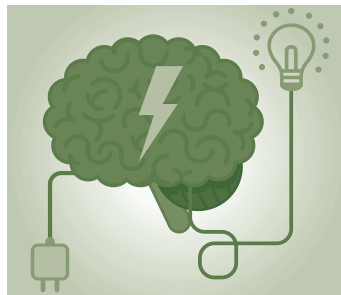

This issue of the *Residents' Journal* focuses on the topic of advances in antidepressant therapy. In an editorial, Samuel T. Wilkinson, M.D., discusses the renewed search for new targets and treatments for major depressive disorder. In a review article, Sandarsh Surya, M.B.B.S., and Neil Mori, M.D., examine recent evidence for methods designed to maximize the therapeutic benefit of ECT, minimizing side effects and preventing relapse. Mahalia L. Way, M.D., Ph.D., analyzes clinical trials of the use of ketamine infusion for the treatment of depression. Stanley Lyndon, M.D., explores low-field magnetic stimulation as a potential treatment modality. In a treatment in psychiatry article, Laurel D. Pellegrino, M.D., outlines current recommendations for treating major depression with psychotic features, including discussion of relapse rates with antidepressant monotherapy and with antipsychotic therapy, as well as ongoing research. Lastly, Meredith Brandon, M.D., describes a case of drug reaction with eosinophilia and systemic symptoms during sertraline and aripiprazole treatment in an adolescent patient.

Editor-in-Chief  
Misty Richards, M.D., M.S.

Senior Deputy Editor  
Rajiv Radhakrishnan, M.B.B.S., M.D.

Deputy Editor  
Tobias Wasser, M.D.

Guest Section Editor  
Samuel T. Wilkinson, M.D.

Associate Editors  
Ijeoma Chukwu, M.D., M.P.H.  
Kathleen Mary Patchan, M.D.

Media Editor  
Holly S. Peek, M.D., M.P.H.

Staff Editor  
Angela Moore

Editors Emeriti  
Sarah B. Johnson, M.D.  
Molly McVay, M.D.  
Joseph M. Cerimele, M.D.  
Sarah M. Fayad, M.D.  
Monifa Seawell, M.D.

### Editor-in-Chief

Misty Richards, M.D., M.S.

### Senior Deputy Editor

Rajiv Radhakrishnan, M.B.B.S., M.D.

### Deputy Editor

Tobias Wasser, M.D.

### Associate Editors

Ijeoma Chukwu, M.D., M.P.H.

Kathleen Mary Patchan, M.D.

### Media Editor

Holly S. Peek, M.D., M.P.H.

*The Residents' Journal* accepts manuscripts authored by medical students, resident physicians, and fellows. To submit your paper, please visit the manuscript submission site at [mc.manuscriptcentral.com/appi-ajp](http://mc.manuscriptcentral.com/appi-ajp) and either create an account or use your existing account. For manuscript type, select "Residents." Then follow the instructions to upload your manuscript. Residents who are interested in participating as Guest Section Editors should e-mail *The Residents' Journal* Editor-in-Chief Misty Richards at [misty.richards@gmail.com](mailto:misty.richards@gmail.com).

*The Residents' Journal* is sent free-of-charge to all psychiatry residents. Anyone interested in being included on the distribution list should contact Angela Moore, *The Residents' Journal* staff editor at [ajp@psych.org](mailto:ajp@psych.org) with "Subscribe to Residents' Journal" in the subject line.

To access the complete Residents' Journal archives, visit [ajp.psychiatryonline.org/residents\\_journal](http://ajp.psychiatryonline.org/residents_journal)

# THE AMERICAN PSYCHIATRIC ASSOCIATION

1000 Wilson Blvd., Suite 1825, Arlington, VA 22209-3901  
(888) 357-7924 (toll-free inside the U.S. and Canada) / (703) 907-7300  
web site: [www.psychiatry.org](http://www.psychiatry.org) • e-mail: [apa@psych.org](mailto:apa@psych.org)

## Chairpersons of Councils, Commissions, Committees, and Task Forces

### Standing Committees

|                             |                                |
|-----------------------------|--------------------------------|
| <b>Bylaws</b>               | Rebecca W. Brendel, M.D., J.D. |
| <b>Elections</b>            | Barry K. Herman, M.D.          |
| <b>Ethics</b>               | Richard D. Milone, M.D.        |
| <b>Finance and Budget</b>   | Alan F. Schatzberg, M.D.       |
| <i>Audit</i>                | Frank W. Brown, M.D.           |
| <i>Investment Oversight</i> | David Fassler, M.D.            |
| <b>Joint Reference</b>      | Renée L. Binder, M.D.          |
| <b>Membership</b>           | Rahn K. Bailey, M.D.           |
| <b>Nominating</b>           | Jeffrey A. Lieberman, M.D.     |
| <b>Tellers</b>              | Hind Benjelloun, M.D.          |

### Councils

#### **Council on Addiction Psychiatry**

Frances R. Levin, M.D.

#### **Council on Advocacy and Government Relations**

Barry B. Perlman, M.D.

*Advocacy and Litigation Funding*

Jack Drescher, M.D.

*Caucus of State Hospital Psychiatrists*

*Caucus of VA Psychiatrists*

#### **Council on Children, Adolescents, and Their Families**

Louis J. Kraus, M.D.

*Agnes Purcell McGavin Award*

Christopher J. McDougle, M.D.

*Blanche F. Ittleson Research Award*

*Caucus of Psychiatrists Treating Persons With Intellectual Disabilities*

*College Mental Health Caucus*

#### **Council on Communications**

Raymond J. DePaulo, M.D.

#### **Council on Geriatric Psychiatry**

Robert P. Roca, M.D.

#### **Council on Healthcare Systems and Financing**

Harsh K. Trivedi, M.D.

*Reimbursement for Psychiatric Care*

Bruce J. Schwartz, M.D.

*RBRVS, Codes and Reimbursement*

Ronald M. Burd, M.D.

#### **Council on International Psychiatry**

Dilip V. Jeste, M.D.

*Caucus on Global Mental Health and Psychiatry*

#### **Council on Medical Education and Lifelong Learning**

Richard F. Summers, M.D.

*APA Public Psychiatry Fellowship Selection Committee*  
Christina V. Mangurian, M.D.

*APA/SAMHSA Minority Fellowship Selection and Advisory*  
Altha J. Stewart, M.D.

*Caucus on MOC Issues*

*Caucus of Resident-Fellow Members*

*Scientific Program*

Philip R. Muskin, M.D.

*Scientific Program Committee of the Institute on Psychiatric Services*

Hunter L. McQuiston, M.D.

*Subcommittee on Joint Sponsorship of Continuing Medical Education (CME)*

*Vestermark Award Committee*

Jonathan F. Borus, M.D.

#### **Council on Minority Mental Health and Health Disparities**

Sandra C. Walker, M.D.

*Caucus of Rural Psychiatrists*

*Caucus on Religion, Spirituality and Psychiatry*

#### **Council on Psychiatry And Law**

Steven K. Hoge, M.D.

*Caucus of Correctional Psychiatrists*

*Isaac Ray/Human Rights Award*

Mardoche Sidor, M.D.

*Judicial Action*

Paul S. Appelbaum, M.D.

*Manfred S. Guttmacher Award*

David A. Lowenthal, M.D.

#### **Council on Psychosomatic Medicine (Consultation Liaison Psychiatry)**

David F. Gitlin, M.D.

#### **Council on Quality Care**

Joel Yager, M.D.

*Mental Health Information Technology*

Steven Roy Daviss, M.D.

*Steering Committee on Practice Guidelines*

Michael J. Vergare, M.D.

#### **Council on Research**

Dwight L. Evans, M.D.

*Caucus of Psychiatrists Treating Persons with Eating Disorders*

*Caucus on Alternative and Complementary Medicine*

*Psychiatric Dimensions of Disasters*

Charles R. Marmar, M.D.

*Research Awards*

B. Timothy Walsh, M.D.

*Task Force to Revise the Practice of Electroconvulsive Therapy*

# There's So Much More to AJP Than Meets the Page!

Visit *The American Journal of Psychiatry's* website on PsychiatryOnline for the following features!

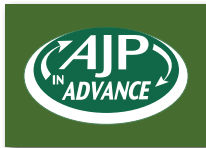

## AJP in Advance

The very latest research advances!

At **AJP in Advance**, you can discover the following before their appearance in print:

### Neuropsychiatric Symptoms as Predictors of Progression to Severe Alzheimer's Dementia

Psychosis, agitation/aggression, and any clinically significant neuropsychiatric symptom predicted faster progression to severe Alzheimer's dementia or to death. Sooner death was also predicted by affective symptoms.

### Treatment of Maternal Depression in a Medication Clinical Trial and Its Effect on Children

Escitalopram, bupropion, and combined escitalopram/bupropion all reduced depressive symptoms in mothers, but only escitalopram monotherapy improved depressive symptoms in the children as well

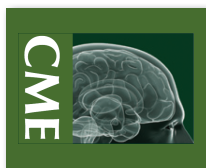

## AJP CME

Three articles in this issue form the basis of a short course with questions that can be answered for up to 1 *AMA PRA Category 1 Credit™* each by visiting <http://psychiatryonline.org/cme> and clicking on the "**American Journal of Psychiatry**" tab. CME credit is issued only **online**, and a paid subscription to AJP CME course program is required. This month's courses appear on pages 399–402.

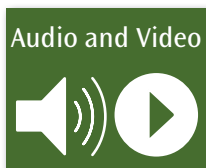

## Have You Heard?

With AJP Audio you can listen to highlights of this issue. This month, Deputy Editor Susan Schultz discusses an innovative study that used an algorithm to search electronic health records for clinical information relevant to the Research Domain Criteria; potentially modifiable conditions that predict a transition from mild cognitive impairment to dementia; a trial of cognitive-bias modification to reduce reactivity to alcohol cues in patients with alcohol dependence; a clinical trial that added health coaching to fitness club membership for overweight persons with serious mental illness; and an intriguing short essay about correspondence between Charles Darwin and the head gardener at an English mental institution.

Also, visit the online edition of this month's *Journal* to view a video of Deputy Editor Daniel S. Pine, M.D., presenting highlights from the issue.

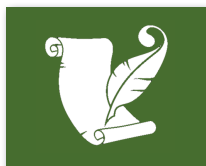

## Revisit the field's rich history!

### 150 years ago this month: "Psychological Analysis of Courage"

The author's analysis proceeds in the wide-ranging fashion of the time, covering aspects of human psychology that remain interesting today. The article was translated from a European publication, however, and the discussion appears not to have been influenced by the U.S. Civil War. The concluding section casts an optimistic eye on present and future: "We see in the marvellous industrial activity of our day, a proof that the tendencies to fight and destroy may find other issues than in war, duels, and the spirit of adventure. An enormous amount of energy, which has hitherto been wasted in the pursuit of false glory, is now utilized in industrial efforts."

### 50 years ago this month

Two years after the infamous Crownsville State Hospital in southern Maryland was desegregated, the authors undertook a survey of the staff, which had approximately equal numbers of blacks and whites. Among their findings: "Even though overt 'racial incidents' have been nearly non-existent, this study reveals covert feelings of anxiety, suspiciousness and denial. Interview evidence indicates these feelings interfere with patient care, hospital functioning and staff morale."

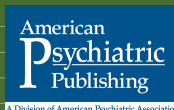

[ajp.psychiatryonline.org](http://ajp.psychiatryonline.org)

[www.appi.org](http://www.appi.org) • 1-800-368-5777 • Fax: 703-907-1091 • Email: [appi@psych.org](mailto:appi@psych.org)

Priority Code AH1330

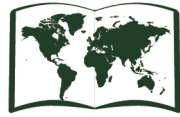

# SHARP

Shanghai Archives of Psychiatry · Since 1959

上 海 精 神 医 学

WWW.SAPONLINE.ORG/EN

FEBRUARY 2015 • VOL. 27 • NO. 1

## IN THIS ISSUE

<http://dx.doi.org/10.11919/j.issn.1002-0829.215020>

## META-ANALYSIS

**Using aripiprazole to reduce antipsychotic-induced hyperprolactinemia: meta-analysis of currently available randomized controlled trials**

*Meiling MENG, Wei LI, Shaowei ZHANG, Hongyan WANG, Jianhua SHENG, Jijun WANG, Chunbo LI*

<http://dx.doi.org/10.11919/j.issn.1002-0829.215014>

## ORIGINAL RESEARCH ARTICLES

**Cross-sectional evaluation of the adequacy of guardianship by family members of community-residing persons with mental disorders in Changning District, Shanghai**

*Qiongtong ZHANG, Hao CHEN, Kang JU, Xin NIU, Lanjun SONG, Jia CHUI*

<http://dx.doi.org/10.11919/j.issn.1002-0829.214094>

**Social media and suicide prevention: findings from a stakeholder survey**

*Jo ROBINSON, Maria RODRIGUES, Steve FISHER, Eleanor BAILEY, Helen HERRMAN*

<http://dx.doi.org/10.11919/j.issn.1002-0829.214133>

**Comparison of the personality and other psychological factors of students with internet addiction who do and do not have associated social dysfunction**

*Qiang CHEN, Xing QUAN, Huimin LU, Pei FEI, Ming LI*

<http://dx.doi.org/10.11919/j.issn.1002-0829.214129>

## FORUM:

### ATTENUATED PSYCHOSIS SYNDROME

**Psychosis risk syndrome is not prodromal psychosis**

*Lihua XU, Tianhong ZHANG, Jijun WANG*

<http://dx.doi.org/10.11919/j.issn.1002-0829.214178>

**Challenges in the early detection and intervention of the psychosis-risk syndrome**

*Hailong LV, Xin ZHOU, Jingping ZHAO*

<http://dx.doi.org/10.11919/j.issn.1002-0829.215016>

**Attenuated psychosis syndrome: benefits of explicit recognition**

*Jason SCHIFFMAN, William T. CARPENTER*

<http://dx.doi.org/10.11919/j.issn.1002-0829.215015>

## CASE REPORT

**Case report of rabies-induced persistent mental symptoms**

*Xiaoqing WANG, Xiaowen YU, Yangtai GUAN*

<http://dx.doi.org/10.11919/j.issn.1002-0829.214174>

## RESEARCH METHODS IN PSYCHIATRY

**Brief Chinese version of the Family Experience Interview Schedule to assess caregiver burden of family members of individuals with mental disorders**

*Hongbo HE, Yanling ZHOU, Bin SUN, Yaoguang GUO, Robert A. ROSENHECK*

<http://dx.doi.org/10.11919/j.issn.1002-0829.214138>

## BIostatistics in Psychiatry (25)

**Kappa coefficient: a popular measure of rater agreement**

*Wan TANG, Jun HU, Hui ZHANG, Pan WU, Hua HE*

<http://dx.doi.org/10.11919/j.issn.1002-0829.215010>
