## PERSPECTIVAS

### EDITORIALES

- 305 ¿Por qué no usar un tratamiento basado en la evidencia al tratar los trastornos por abuso de alcohol?**  
*Charles O'Brien, M.D., Ph.D.*
- 307 Proteína C reactiva: Un marcador de diátesis de estrés en la encrucijada de secuelas de comportamiento no adaptativo y secuelas cardiometabólicas**  
*Ronen H. Segman, M.D., y Murray B. Stein, M.D., M.P.H.*
- 310 Historias clínicas electrónicas: Vía rápida hacia grandes volúmenes de datos en el trastorno bipolar**  
*James B. Potash, M.D., M.P.H.*
- 312 Evidencia de la esquizofrenia como un trastorno de la neuroplasticidad**  
*Robert E. McCullumsmith, M.D.*

### COMENTARIO

- 314 La vigilancia de la salud mental en China: Un largo camino por recorrer**  
*Wei Zhou, M.A., y Shuiyuan Xiao, M.D.*

### FORMACIÓN EN PSIQUIATRÍA

- 316 Una perspectiva clínica de la importancia de los Criterios del Dominio de la Investigación en las historias clínicas electrónicas**  
*Thomas H. McCoy, M.D., et al.* **AUDIO • GUÍAS CLÍNICAS**

### IMÁGENES EN PSIQUIATRÍA

- 321 Charles Darwin y Las Cartas del Manicomio**  
*Malcolm King, M.S., R.N.* **AUDIO**

### RESÚMENES Y RESEÑAS

-  **323 Predictores modificables de demencia en el deterioro cognitivo leve: Una revisión sistemática y meta-análisis**  
*Claudia Cooper, Ph.D., M.R.C.Psych., et al.* **AUDIO • GUÍAS CLÍNICAS**

## NUEVAS INVESTIGACIONES

### ARTÍCULOS

- 335 Efecto del entrenamiento para la modificación del sesgo cognitivo sobre la reactividad neural a señales de alcohol en personas con dependencia del alcohol**  
*Corinde E. Wiers, Ph.D., et al.* **AUDIO • EDITORIAL • VIDEO**
-  **344 Replica pragmática del ensayo de entrenamiento de promoción de salud para la obesidad en enfermedades mentales graves y mantenimiento de los resultados**  
*Stephen J. Bartels, M.D., M.S., et al.* **AUDIO • CME • GUÍAS CLÍNICAS**
- 353 Asociación de la variación genética de la PCR y del nivel de PCR con síntomas elevados de TEPT y respuestas fisiológicas en una población civil con altos niveles de trauma**  
*Vasiliki Michopoulos, Ph.D., et al.* **AUDIO • EDITORIAL**

- 363 Validación de fenotipos de trastorno bipolar y de controles basados de documentación electrónica de casos clínicos**  
*Victor M. Castro, M.S., et al.* CME • EDITORIAL • VIDEO
- 373 Proteínas sinápticas en el hipocampo son indicativas de mayor actividad neuronal en la región CA3 en esquizofrenia**  
*Wei Li, M.D., et al.* EDITORIAL
- 383 Aprendizaje espacial basado en recompensas en adultos no medicados con trastorno obsesivo-compulsivo**  
*Rachel Marsh, Ph.D., et al.* CME

## COMUNICADOS Y ACTUALIZACIONES

### CARTAS AL EDITOR

- 393 Tratamientos para el trastorno de ansiedad social: Consideraciones acerca de los hallazgos de la terapia psicodinámica**
- 394 Diferencias de género en la respuesta a la vareniclina para dejar de fumar**
- 395 La asociación de un sitio de metilación cerebral con resultados clínicos en la depresión no se replica en diferentes poblaciones**

## OTROS TEMAS DE INTERÉS

- 398 [Disclosure of Editors' Financial Relationships]**
- 399 Educación Médica Continuada**
- A8 *Shanghai Archives of Psychiatry* Tabla de Contenidos**

**Cubierta:** [While Charles Darwin was writing *On the Origin of Species*, he remained active in gathering new data that might help him refine his themes. This month's "Image in Psychiatry" (p. 321) presents the intriguing correspondence between Darwin and Henry Coe, Head Gardener at the Hampshire County Lunatic Asylum, who had unexpectedly produced new varieties of dwarf kidney and runner beans. An unplanned appeal of a patient for his release was found in Darwin's papers.]

Article content that addresses **Core Competencies**, defined by the Accreditation Council of Graduate Medical Education and the American Board of Medical Specialties, is indicated by the following symbols:

-  Professionalism
-  Patient Care and Procedural Skills
-  Medical Knowledge
-  Practice-Based Learning and Improvement
-  Interpersonal and Communication Skills
-  Systems-Based Practice.

More information is available at [www.abms.org/maintenance\\_of\\_certification/MOC\\_competencies.aspx](http://www.abms.org/maintenance_of_certification/MOC_competencies.aspx)

### La Tabla de Contenidos y resúmenes de Este Número Está Disponible en Español

*(This issue's Table of Contents and abstracts are available in Spanish)*

Translation presented in collaboration with the Office of Global Health, Rutgers-Robert Wood Johnson Medical School

Support for this effort provided by ACTA Colombia.

#### Translation courtesy of

**Sergi Casals, M.A.**

Garuna, Medellín, Colombia ([www.garunaeditors.com](http://www.garunaeditors.com))

**Carlos Lopez Jaramillo, M.D.**

Universidad de Antioquia, Medellín, Colombia

**Javier I. Escobar, M.D., M.Sc.**

Rutgers-Robert Wood Johnson Medical School

**AUDIO** Highlighted in AJP Audio, a downloadable .mp3 file available at [ajp.psychiatryonline.org](http://ajp.psychiatryonline.org)

**CME** A course covering the content of this article is available online for paid subscribers to the AJP CME Course program

**EDITORIAL** Discussed in one of the issue's editorials

**VIDEO** Highlighted online by Deputy Editor Daniel S. Pine, M.D.

**GUÍAS CLÍNICAS** Clinical Guidance provided on the English table of contents

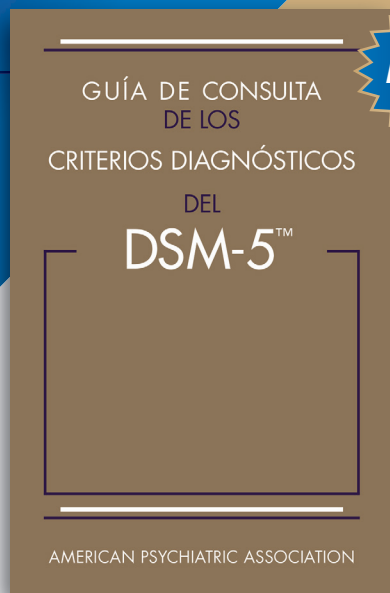

**Nuevo!**

## Guía de consulta de los criterios diagnósticos del DSM-5™

**Spanish Edition of the Desk Reference to the Diagnostic Criteria From DSM-5™**

American Psychiatric Association

La Guía de consulta de los criterios diagnósticos del DSM-5™ es una ayuda concisa y asequible para la referencia psiquiátrica fundamental, el DSM-5™. Incluye la clasificación diagnóstica completa revisada, así como todos los criterios diagnósticos del DSM-5™ en un formato fácil de utilizar. Esta cómoda referencia proporciona un acceso rápido a la información esencial para emitir un diagnóstico. Diseñado como complemento del DSM-5™, esta cómoda guía ayudará a los profesionales de la salud mental a incorporar los criterios diagnósticos del DSM-5™ en sus diagnósticos.

El Manual diagnóstico y estadístico de los trastornos mentales es la máxima referencia autorizada para la práctica clínica en el campo de la salud mental. Los cambios estructurales y diagnósticos de la quinta edición son un material que todos los clínicos "deben conocer". La Guía de consulta de los criterios diagnósticos del DSM-5™ condensa la información diagnóstica actualizada esencial de este manual para ofrecer a los clínicos un recurso inestimable para diagnosticar con eficacia los trastornos mentales, desde el de mayor prevalencia al menos frecuente.

2014 • 490 pages • ISBN 978-0-89042-551-0 • Paperback • \$69.00 • Item #2551

*También disponible en Español*

### Aplicación para celular de los Criterios Diagnósticos del DSM-5™

La Aplicación Móvil de Criterios Diagnósticos DSM-5™ proporciona a los profesionales, investigadores y estudiantes de la salud mental un rápido acceso a códigos y criterios vitales de DSM para que puedan integrar por completo los nuevos datos en su práctica y sus estudios. Los usuarios tienen acceso completo fuera de línea a todos los conjuntos de criterios, además de acceso en línea a vídeos, comentarios y recursos de apoyo. Sus poderosas herramientas de personalización y de búsqueda ayudan y mejoran la valoración de las presentaciones de los síntomas en diversos entornos clínicos y administrativos.

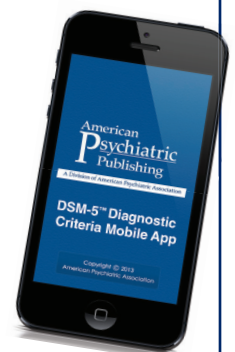

Ahora disponible para dispositivos iOS y Android.

## Predictores modificables de demencia en el deterioro cognitivo leve: Una revisión sistemática y meta-análisis

Claudia Cooper, Ph.D., M.R.C.Psych.; Andrew Sommerlad, M.R.C.Psych.; Constantine G. Lyketsos, M.D., M.H.S.; Gill Livingston, M.D., F.R.C.Psych.

**Objetivo:** Las campañas de salud pública que promueven la búsqueda temprana de ayuda han aumentado las tasas de diagnóstico de deterioro cognitivo leve (DCL) en los países occidentales, pero poco sabemos sobre cómo tratar o predecir la demencia resultante en las personas que sufren este tipo de deterioro cognitivo.

**Método:** Los autores realizaron búsquedas en bases de datos electrónicas y referencias de estudios longitudinales que reportaran factores de riesgo potencialmente modificables de demencia incidental después de DCL. Dos autores evaluaron por separado la calidad de los estudios utilizando una lista de chequeo. Se hicieron meta-análisis de tres estudios o más.

**Resultados:** Hubo 76 artículos elegibles. La diabetes y la prediabetes aumentan el riesgo de conversión de DCL amnésico a demencia de Alzheimer; el riesgo en diabetes tratada versus no tratada fue más bajo en un estudio. La diabetes también se asoció con mayor riesgo de conversión de cualquier tipo de DCL no amnésico a demencia ocasionada por cualquier causa. El síndrome metabólico y la prediabetes predicen la de-

mencia originada por cualquier causa, en personas con DCL amnésico y de cualquier tipo respectivamente. La dieta mediterránea disminuye el riesgo de conversión a demencia de Alzheimer. La presencia de síntomas neuropsiquiátricos o niveles bajos de folato sérico predicen la conversión de cualquier tipo de DCL a demencia por cualquier causa, pero la variable "menos tiempo de educación formal" no tuvo el mismo efecto. Los síntomas depresivos predicen la conversión de cualquier tipo de DCL a demencia por cualquier causa en los estudios epidemiológicos, pero no en los clínicos.

**Conclusiones:** La diabetes aumenta el riesgo de conversión a demencia. Otros factores pronósticos que son potencialmente manejables son la prediabetes y el síndrome metabólico, los síntomas neuropsiquiátricos y bajo folato alimentario. Las intervenciones en la dieta y las intervenciones para reducir los síntomas neuropsiquiátricos, incluyendo la depresión, que aumentan el riesgo de conversión a demencia, pueden reducir la nueva incidencia de la demencia.

(*Am J Psychiatry* 2015; 172:323–334)

# Efecto del entrenamiento para la modificación del sesgo cognitivo sobre la reactividad neural a señales de alcohol en personas con dependencia del alcohol

Corinde E. Wiers, Ph.D.; Christine Stelzel, Ph.D.; Thomas E. Gladwin, Ph.D.; Soyoun Q. Park, Ph.D.; Steffen Pawelczack, M.Sc.; Christiane K. Gawron, Cand.med.; Heiner Stuke, M.D.; Andreas Heinz, M.D., Ph.D.; Reinout W. Wiers, Ph.D.; Mike Rinck, Ph.D.; Johannes Lindenmeyer, Ph.D.; Henrik Walter, M.D., Ph.D.; Felix Bermpohl, M.D., Ph.D.

**Objetivo:** En los pacientes dependientes del alcohol, las señales de alcohol evocan una mayor activación en las áreas cerebrales mesolímbicas, como el núcleo accumbens y la amígdala. Además, los pacientes muestran un sesgo hacia el alcohol, una tendencia a acercarse más rápido al alcohol que a evitarlo. Se ha demostrado que el entrenamiento de modificación del sesgo cognitivo, cuyo objetivo es re-entrenar los sesgos de acercamiento, reduce el antojo de alcohol y las tasas de recaída. Los autores investigaron los efectos de este entrenamiento en la reactividad a las señales en pacientes dependientes del alcohol.

**Método:** En un diseño doble ciego aleatorizado, 32 pacientes dependientes del alcohol en abstinencia recibieron entrenamiento de modificación del sesgo o entrenamiento simulado. Ambos entrenamientos consistían en seis sesiones de la tarea de aproximación-evitación utilizando un "joystick". El entrenamiento de modificación del sesgo conllevó la eliminación del 90% de las señales de alcohol y el 10% de las señales de bebidas no alcohólicas, mientras que esta proporción fue de 50/50 en el entrenamiento simulado. La reactividad a las señales de alcohol se midió con IRM funcional antes y después del entrenamiento.

**Resultados:** Antes del entrenamiento, se observó activación evocada por las señales de alcohol bilateralmente en la amígdala y en el núcleo accumbens derecho, aunque en este último no fue significativa. La activación en la amígdala se correlacionó con las clasificaciones de las ansias de tomar y de la excitación causadas por estímulos de alcohol; en el núcleo accumbens, estas correlaciones tampoco fueron significativas. Después del entrenamiento, el grupo de modificación del sesgo mostró mayores reducciones en la activación evocada por señales en la amígdala bilateralmente y en las evaluaciones de excitación del comportamiento causado por imágenes de bebidas alcohólicas, comparado con el grupo que recibió el entrenamiento simulado. La disminución de la actividad en la amígdala derecha se correlacionó con disminuciones de las ansias en el grupo de modificación del sesgo, pero no en el grupo de entrenamiento simulado.

**Conclusiones:** Estos hallazgos presentan evidencia de que la modificación del sesgo cognitivo afecta la actividad cerebral mesolímbica inducida por señales de alcohol. Las reducciones en la reactividad neural pueden ser un mecanismo subyacente clave de la efectividad terapéutica de este entrenamiento.

*(Am J Psychiatry 2015; 172:335–343)*

# Réplica pragmática del ensayo de entrenamiento de promoción de salud para la obesidad en enfermedades mentales graves y mantenimiento de los resultados

Stephen J. Bartels, M.D., M.S.; Sarah I. Pratt, Ph.D.; Kelly A. Aschbrenner, Ph.D.; Laura K. Barre, M.D.; John A. Naslund, M.P.H.; Rosemarie Wolfe, M.S.; Haiyi Xie, Ph.D.; Gregory J. McHugo, Ph.D.; Daniel E. Jimenez, Ph.D.; Ken Jue, M.S.S.A.; James Feldman, M.D., M.P.H.; Bruce L. Bird, Ph.D.

**Objetivo:** Pocos estudios centrados en la obesidad en enfermedades mentales graves han reportado una reducción del riesgo clínicamente significativa, y ninguno ha sido replicado en el contexto de la atención comunitaria ni ha demostrado que los resultados se hayan mantenido después de haber finalizado la intervención. Los autores se propusieron replicar los resultados de salud positivos demostrados en un estudio aleatorizado previo de efectividad en el programas *In SHAPE* en diferentes organizaciones comunitarias de salud mental que atienden a una población étnicamente diversa.

**Método:** Se reclutaron personas con enfermedades mentales graves y con un índice de masa corporal (IMC) >25, atendidas en tres organizaciones comunitarias de salud mental, y aleatoriamente se les asignó al programa de *In SHAPE* de 12 meses, que incluía la membresía en un gimnasio público y encuentros semanales con un entrenador par a la promoción de la salud, o solamente se les dio la membresía del gimnasio. Las medidas de resultados primarias fueron el peso y la salud cardiorrespiratoria (que se midió con la prueba de caminar durante 6 minutos), evaluadas al inicio del estudio y a los 3, 6, 9, 12 y 18 meses.

**Resultados:** Los participantes (N=210) eran étnicamente diversos (el 46% no eran blancos), con un IMC medio al inicio del estudio de 36,8 (DE=8,2). A los 12 meses, el grupo de *In SHAPE* (N=104) había perdido más peso y mejorado la salud, en comparación con el grupo al que solamente se le había dado la membresía al gimnasio (N=106). Los resultados primarios se mantuvieron a los 18 meses. Aproximadamente la mitad del grupo de *In SHAPE* (el 51% a los 12 meses y el 46% a los 18 meses) alcanzó una reducción del riesgo cardiovascular clínicamente significativa (una pérdida de peso  $\geq 5\%$  o un aumento de >50 metros en la prueba de caminar por 6 minutos).

**Conclusiones:** Este es la primera réplica del estudio que confirma la efectividad de una intervención de asesoramiento en salud para lograr y mantener reducciones de riesgo cardiovascular clínicamente significativas para personas con sobrepeso u obesas con enfermedades mentales graves.

(*Am J Psychiatry* 2015; 172:344–352)

## Asociación de la variación genética de la PCR y del nivel de PCR con síntomas elevados de TEPT y respuestas fisiológicas en una población civil con altos niveles de trauma

Vasiliki Michopoulos, Ph.D.; Alex O. Rothbaum, B.S.; Tanja Jovanovic, Ph.D.; Lynn M. Almlí, Ph.D.; Bekh Bradley, Ph.D.; Barbara O. Rothbaum, Ph.D.; Charles F. Gillespie, M.D., Ph.D.; Kerry J. Ressler, M.D., Ph.D.

**Objetivo:** La inflamación sistémica aumentada se asocia con la psicopatología relacionada con el estrés. Concretamente, los niveles de la proteína C reactiva (PCR), que es un marcador proinflamatorio, son elevados en individuos con trastorno por estrés postraumático (TEPT). Además, los polimorfismos de un solo mononucleótido (SNP) en el gen de la PCR están asociados con el nivel de PCR, el riesgo de enfermedad cardiovascular y la obesidad. Los autores examinaron si los polimorfismos dentro del gen de la PCR y los niveles aumentados de PCR están asociados con los síntomas del TEPT y la fisiología del miedo en una población civil con niveles altos de trauma.

**Método:** Se recogieron datos transversales y muestras de ADN de 2.698 personas de un hospital público en un área urbana que atiende una población primordialmente afroamericana de nivel socioeconómico bajo. Un subgrupo de 187 participantes participaron en más entrevistas, pruebas y medidas fisiológicas; de estos, 135 fueron evaluados utilizando el paradigma del sobresalto potenciado por miedo para evaluar los fenotipos relacionados del TEPT.

**Resultados:** Un SNP dentro del gen de la PCR, el rs1130864, estuvo asociado de forma significativa con síntomas aumen-

tados de TEPT (N=2.692), incluyendo "estar excesivamente alerta" como el síntoma individual más significativo (N=2.698). Adicionalmente, el genotipo de la PCR se asoció con las probabilidades de diagnóstico de TEPT (N=2.692). Este SNP también se asoció con un nivel aumentado de PCR (N=137), y los niveles altos de PCR (>3 mg/L) se asociaron positivamente con los síntomas del TEPT (N=187), y el sobresalto potenciado por miedo, con una señal de seguridad (N=135).

**Conclusiones:** En su conjunto, estos datos indican que la variabilidad genética en el gen de la PCR está asociado con el nivel en suero de la PCR y la severidad de los síntomas de TEPT, incluyendo el de los síntomas de hiperactivación. Los niveles elevados de PCR también se asociaron con la psicofisiología relacionada con el miedo, y con el diagnóstico y las evaluaciones de síntomas de TEPT exacerbados. Estos hallazgos sugieren un mecanismo potencial por el cual el estado proinflamatorio aumentado pueden tener como resultado síntomas de TEPT más marcados.

(*Am J Psychiatry* 2015; 172:353–362)

## Validación de fenotipos de trastorno bipolar y de controles basados en documentación electrónica de casos clínicos

Victor M. Castro, M.S.; Jessica Minnier, Ph.D.; Shawn N. Murphy, M.D., Ph.D.; Isaac Kohane, M.D., Ph.D.; Susanne E. Churchill, Ph.D.; Vivian Gainer, M.S.; Tianxi Cai, Sc.D.; Alison G. Hoffnagle, M.S.; Yael Dai, B.A.; Stefanie Block, M.S.; Sydney R. Weill, B.A.; Mireya Nadal-Vicens, M.D., Ph.D.; Alisha R. Pollastri, Ph.D.; J. Niels Rosenquist, M.D., Ph.D.; Sergey Goryachev, M.S.; Dost Ongur, M.D., Ph.D.; Pamela Sklar, M.D., Ph.D.; Roy H. Perlis, M.D., M.Sc.; Jordan W. Smoller, M.D., Sc.D.; for the International Cohort Collection for Bipolar Disorder Consortium

**Objetivo:** El estudio se diseñó para validar el uso de las historias clínicas electrónicas (HCE) para diagnosticar casos de trastorno bipolar y clasificar sujetos de control.

**Método:** Los datos de las HCE se obtuvieron de un sistema de atención sanitaria de más de 20 años con más de 4,6 millones de pacientes. Clínicos con experiencia revisaron las tablas para identificar aspectos textuales y datos codificados que fueran consistentes o inconsistentes con un diagnóstico de trastorno bipolar. Se utilizó procesamiento del lenguaje natural para probar un algoritmo de diagnóstico con un 95% de especificidad para clasificar el trastorno bipolar. Se emplearon datos codificados filtrados para derivar tres reglas adicionales de clasificación para sujetos caso y una para sujetos control. El valor predictivo positivo (VPP) de los diagnósticos basados en HCE de trastorno bipolar y diagnósticos de subfenotipos se calculó para compararlo con los diagnósticos obtenidos con entrevistas directas semi-estructuradas a 190 pacientes, realizadas por clínicos entrenados, ciegos a los diagnósticos de las HCE.

**Resultados:** El VPP del trastorno bipolar definido por el procesamiento de lenguaje natural fue de 0,85. La clasificación codificada basada en un filtro estricto alcanzó un valor de 0,79, pero las predicciones hechas con clasificaciones basadas en criterios menos rigurosos fueron menos precisas. Ningún sujeto control clasificado según la HCE recibió un diagnóstico de trastorno bipolar cuando se clasificó con base en la entrevista directa (VPP= 1,0). Para la mayoría de los subfenotipos, los valores excedieron 0,80. Las clasificaciones basadas en HCE se utilizaron para compilar 4.500 casos de trastorno bipolar y 5.000 controles para análisis genéticos.

**Conclusiones:** El rastreo semi-automatizado de HCE puede servir para identificar pacientes de trastorno bipolar y sujetos de control, con alta especificidad y gran valor predictivo en comparación con las entrevistas de diagnóstico. Las HCEs brindan un recurso poderoso para una fenotipificación de alto rendimiento para la investigación genética y clínica.

(*Am J Psychiatry* 2015; 172:363–372)



## Proteínas sinápticas en el hipocampo son indicativas de mayor actividad neuronal en la región CA3 en esquizofrenia

Wei Li, M.D.; Subroto Ghose, M.D.; Kelly Gleason, M.S.; Anita Begovic, M.D.; Jessica Perez, M.S.; John Bartko, Ph.D.; Scott Russo, Ph.D.; Anthony D. Wagner, Ph.D.; Lynn Selemon, Ph.D.; Carol A. Tamminga, M.D.

**Objetivo:** En esquizofrenia, la perfusión del hipocampo aumenta y la función de la memoria declarativa se degrada. Según un modelo a priori de disfunción del hipocampo en la psicosis esquizofrénica, los autores postularon cambios moleculares y celulares en la región CA3, consistentes con una señalización aumentada del receptor NMDAR.

**Método:** Se analizó el tejido del subcampo hipocampal (regiones CA3, CA1) post mórtem de sujetos con esquizofrenia y sujetos no psiquiátricos de comparación, utilizando la técnica del Western blot y la histoquímica de Golgi para examinar los resultados hipotetizados.

**Resultados:** Tanto los receptores NMDAR que contienen GluN2B (GluN2B/GluN1) como la proteína PSD95 asociada a la membrana postsináptica aumentaron en esquizofrenia en el tejido de la región CA3, pero no en el tejido de la región CA1. Los análisis cuantitativos con la tinción de Golgi de las neuronas del hipocampo demostraron que hay un aumento

de la densidad de la columna en las dendritas apicales de las células piramidales de la región CA3 (estrato radiado) y un aumento del número de excrescencias espinosas.

**Conclusiones:** Los datos del hipocampo son consistentes con la señalización excitatoria aumentada en la región CA3 y/o con una elevación en las sinapsis silenciosas en la región CA3, un estado que puede contribuir al aumento de la potenciación a largo plazo en la región CA3 con la subsiguiente estimulación y "des-silenciamiento". Estos cambios están asociados de una forma plausible con una actividad conjunta aumentada en la región CA3, con la función de la memoria declarativa degradada y con la formación de falsos recuerdos con contenido psicótico. La influencia de estas proyecciones hipocámpales hiperactivas sobre los objetivos en el neocórtex límbico contribuyen a los componentes de las manifestaciones de la esquizofrenia en otras regiones cerebrales.

*(Am J Psychiatry 2015; 172:373–382)*

## Aprendizaje espacial basado en recompensas en adultos con trastorno obsesivo-compulsivo no medicados

Rachel Marsh, Ph.D.; Gregory Z. Tau, M.D., Ph.D.; Zhishun Wang, Ph.D.; Yuankai Huo, M.S.; Ge Liu, M.S.; Xuejun Hao, Ph.D.; Mark G. Packard, Ph.D.; Bradley S. Peterson, M.D.; H. Blair Simpson, M.D., Ph.D.

**Objetivo:** Los autores evaluaron el comportamiento de las áreas mesolímbica y estriatal implicadas en el aprendizaje espacial basado en recompensas en adultos con trastorno obsesivo compulsivo (TOC) no medicados.

**Método:** Se comparó la respuesta dependiente del nivel de oxígeno sanguíneo en IRM funcional en 33 adultos con TOC no medicados y en 33 sujetos sanos de comparación y de las mismas edades, durante una tarea de aprendizaje basado en recompensas. La tarea requería aprendizaje por parte de los sujetos, que les permitiera utilizar señales externas al laberinto, para navegar en un laberinto virtual de ocho brazos en el que debían encontrar recompensas escondidas. Los grupos se compararon en cuanto a sus patrones de activación cerebral asociada con el aprendizaje espacial basado en recompensas versus una condición control en la que las recompensas eran inesperadas porque se asignaban de manera pseudo-aleatoria para evitar experimentalmente el aprendizaje.

**Resultados:** Ambos grupos aprendieron a navegar el laberinto para encontrar recompensas escondidas, pero se detectaron diferencias en la actividad neural durante la navegación y el procesamiento de las recompensas, en las áreas mesolímbica y estriatal. Durante la navegación, el grupo con TOC, a diferencia del grupo sano de comparación, exhibieron activación

en el hipocampo posterior izquierdo. A diferencia de los sujetos sanos, los participantes en el grupo con TOC no mostraron activación en el putamen ventral izquierdo ni en la amígdala cuando anticipaban recompensas, ni en el hipocampo, la amígdala y el putamen izquierdos cuando recibían recompensas inesperadas (condición control). La señal en estas regiones disminuyó en relación al momento de inicio durante la recepción de recompensas inesperadas entre los sujetos del grupo con TOC, y el grado de activación estaba inversamente asociado con síntomas de duda/comprobación.

**Conclusiones:** Los participantes del grupo con TOC mostraron una implicación anómala de los circuitos mesolímbico y estriatal ventral durante el aprendizaje espacial basado en recompensas. Mientras lo sujetos sanos de comparación exhibieron activación en esos circuitos como respuesta a la violación de las expectativas de respuesta, los participantes con TOC no medicados no mostraron dicha activación, si no que confiaron excesivamente en el hipocampo posterior durante el aprendizaje. Así pues, se puede alterar la inervación dopaminérgica de los circuitos de recompensas, y están garantizados futuros estudios de la disfunción hipocampal anterior/posterior en TOC.

(*Am J Psychiatry* 2015; 172:383–392)
